# Supplementary material for: Preparation and characterization of nanocrystalline TixSn1−xO2 solid solutions via a microwave-assisted hydrothermal synthesis process
Source: Royal Society of Chemistry journal article supplement (doi:10.1039/c1ce05353a), 2011-01-01
Supplement: c1ce05353a.pdf [file c1ce05353a.pdf]

## Supplementary Materials for

### Preparation and characterization of nanocrystalline $\text{Ti}_x\text{Sn}_{1-x}\text{O}_2$ solid solutions

#### via a microwave-assisted hydrothermal synthesis process

*Yi-Lin Yang,<sup>b</sup> Chi-Chang Hu,<sup>a,\*</sup> Chi-Chung Hua<sup>b,\*</sup>*

*a:* Department of Chemical Engineering, National Tsing Hua University, Hsin-Chu  
30013, Taiwan

*b:* Department of Chemical Engineering, National Chung Cheng University, Chia-Yi  
621, Taiwan

**This supporting information includes the experimental details, Table S1 and**

**Figures S1-S5.**

### Experimental details:

The  $\text{Ti}_x\text{Sn}_{1-x}\text{O}_2$  solid solutions were prepared through a process of MAHS from 20-mL aqueous solutions containing stoichiometric ratio of  $\text{TiCl}_3$  and  $\text{SnCl}_4$  with a total metallic ion concentration = 20 mM (e.g., 10 mM  $\text{TiCl}_3$  and 10 mM  $\text{SnCl}_4$  for  $\text{Ti}_{0.5}\text{Sn}_{0.5}\text{O}_2$ ). This mixed precursor solution with pH = 1.3 was stirred for 1 hr and then heated at a constant power of 100 W in a microwave reactor (Discover, CEM) from room temperature to 200 °C (ca. 8 min) and kept at this temperature for 10 min with an air-flow cooling. The solution was cooled to room temperature with the same cooling air-flow in ca. 5 min. The solid solution powders were obtained by means of a centrifuge, which were washed with de-ionized water several times until pH close to 7.

The crystalline structures of samples were characterized by an X-ray powder diffractometer ( $\text{CuK}\alpha$ , Ultima IV, Rigaku). The XRD patterns were measured at a scan rate of  $1^\circ \text{min}^{-1}$ . The microstructure, particle size distribution, and electron diffraction patterns of oxides were examined by means of a high-resolution transmission electron microscope (HR-TEM, JEM-3010, JEOL) at 200 kV. The particle size distribution of every sample was determined by the TEM images from 100 randomly-selected particles. Raman spectrograms were measured using a 3D Nanometer Scale Raman PL Micro-spectrometer (Tokyo Instruments, Inc.) with 633

nm radiation of HeNe Laser, which was focused in a circle area less than 1  $\mu\text{m}$  in diameter by using a microprobe with 100-time objective. The UV-VIS diffusion reflectance spectra were measured by an UV-VIS spectrometer (Unicam UV-530) with the wavelength varied from 350 to 800 nm. The composition of solid solutions was measured using an energy-dispersive X-ray (EDX) spectroscope coupled with a field emission scanning electron microscope (FESEM, Hitachi S-4800 type I). The mean error of this EDX analysis is ca. 1.5 wt %. Dynamic light scattering (DLS; 380 ZLS, Nicomp, USA) was used to confirm the particle size distribution of all oxides. The composition of solid solutions was also confirmed using an inductively coupled plasma - atomic emission (ICP-AES; Jarrell-Ash, ICAP 9000).

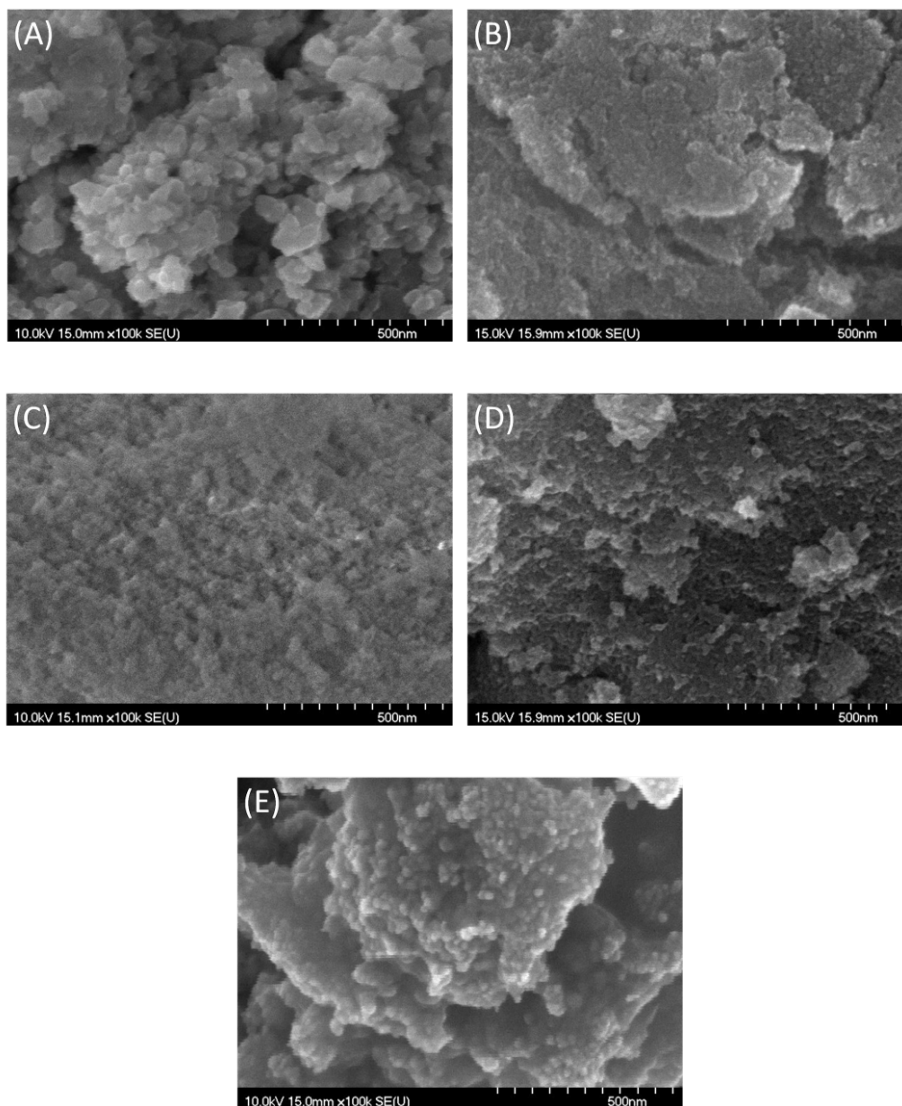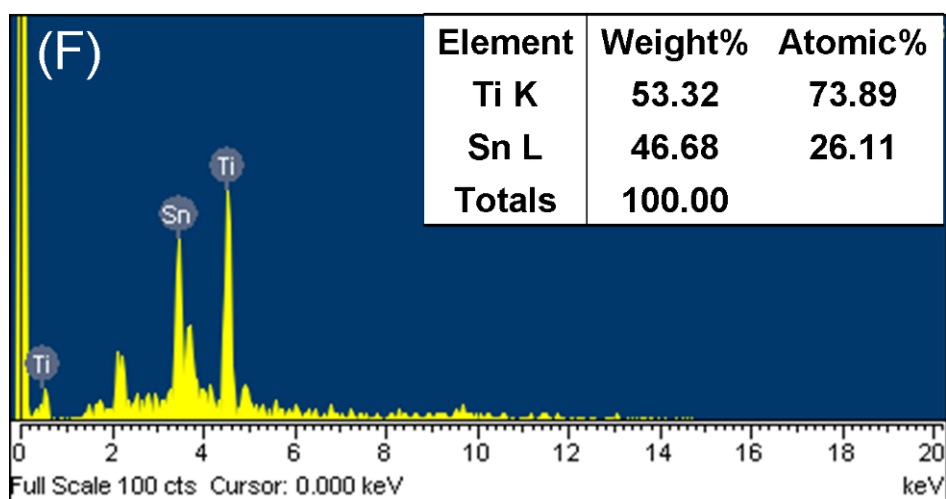

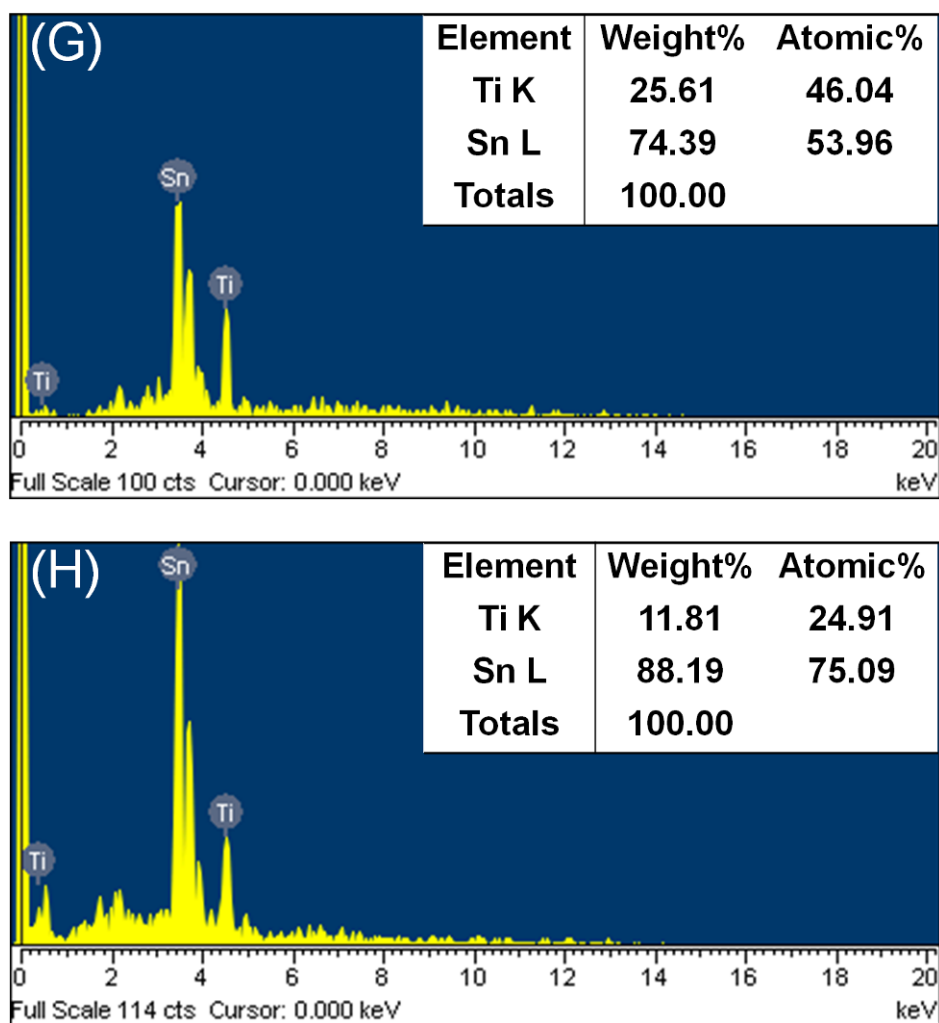

**Figure S1** SEM images of (A) TiO<sub>2</sub>, (B) Ti<sub>0.75</sub>Sn<sub>0.25</sub>O<sub>2</sub>, (C) Ti<sub>0.5</sub>Sn<sub>0.5</sub>O<sub>2</sub>, (D) Ti<sub>0.25</sub>Sn<sub>0.75</sub>O<sub>2</sub>, (E) SnO<sub>2</sub> with annealing in air at 800 °C. The EDX results of (F) Ti<sub>0.75</sub>Sn<sub>0.25</sub>O<sub>2</sub>, (G) Ti<sub>0.5</sub>Sn<sub>0.5</sub>O<sub>2</sub>, and (H) Ti<sub>0.25</sub>Sn<sub>0.75</sub>O<sub>2</sub>.

**Table S1** Composition of  $\text{Ti}_x\text{Sn}_{1-x}\text{O}_2$  solid solutions measured from EDX and ICP

analyses.

| Sample                                       | Composition                                  |                                              |
|----------------------------------------------|----------------------------------------------|----------------------------------------------|
|                                              | EDX                                          | ICP                                          |
| $\text{Ti}_{0.75}\text{Sn}_{0.25}\text{O}_2$ | $\text{Ti}_{0.74}\text{Sn}_{0.26}\text{O}_2$ | $\text{Ti}_{0.66}\text{Sn}_{0.34}\text{O}_2$ |
| $\text{Ti}_{0.5}\text{Sn}_{0.5}\text{O}_2$   | $\text{Ti}_{0.46}\text{Sn}_{0.54}\text{O}_2$ | $\text{Ti}_{0.53}\text{Sn}_{0.47}\text{O}_2$ |
| $\text{Ti}_{0.25}\text{Sn}_{0.75}\text{O}_2$ | $\text{Ti}_{0.25}\text{Sn}_{0.75}\text{O}_2$ | $\text{Ti}_{0.26}\text{Sn}_{0.74}\text{O}_2$ |

According to Table S1, the composition of all solid solutions is generally close to their corresponding precursor composition with the exception of the ICP result for  $\text{Ti}_{0.75}\text{Sn}_{0.25}\text{O}_2$ . This phenomenon is attributable to the excellent chemical stability and a larger size of  $\text{Ti}_{0.75}\text{Sn}_{0.25}\text{O}_2$ ; thus, the repeated digestion may lead to the partial leaching of  $\text{Sn}^{4+}$  species from the solid solution. This statement is consistent with the difficult digestion and partial dissolution of this Ti-rich solid solution.

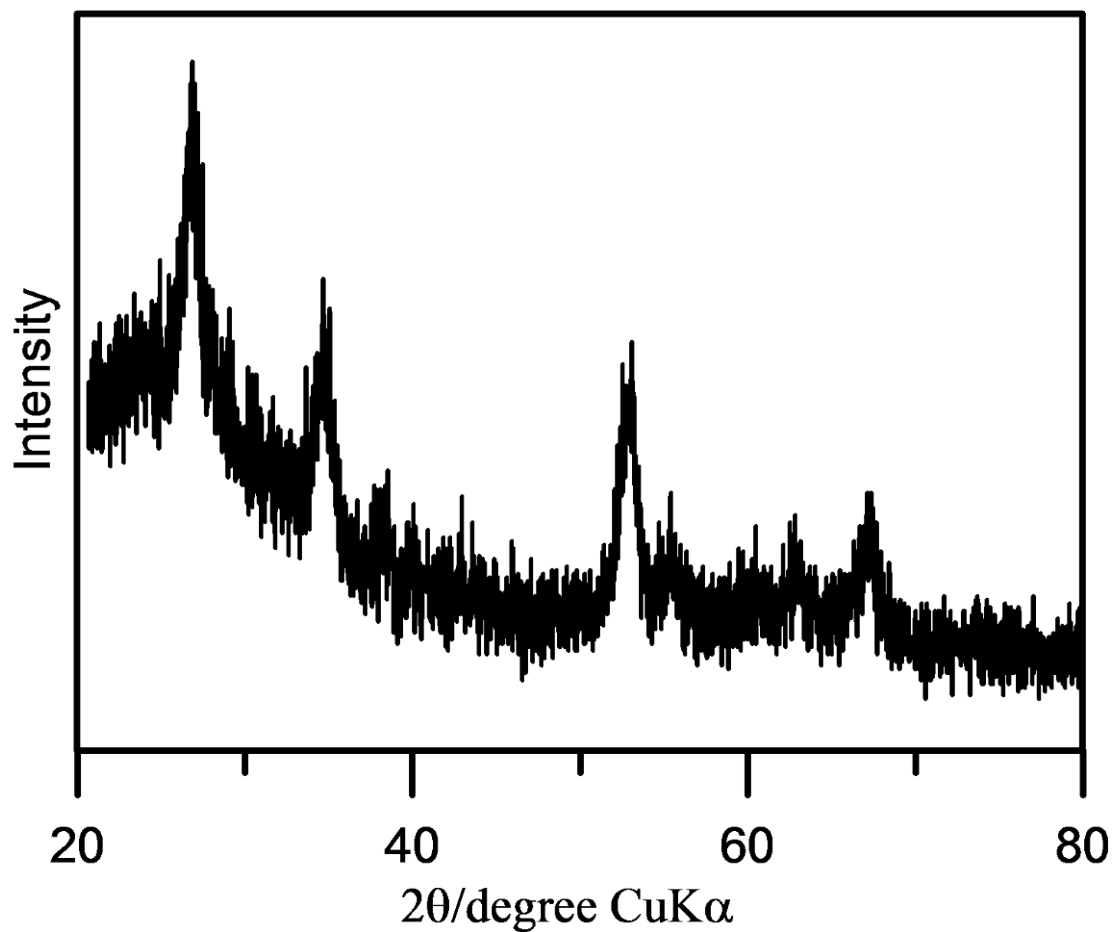

**Figure S2** The XRD pattern of  $\text{Ti}_{0.5}\text{Sn}_{0.5}\text{O}_2$  with annealing in air at 800 °C.

The average crystal size of this solid solution is about 7.6 nm. The XRD pattern shows a stable solid solution.

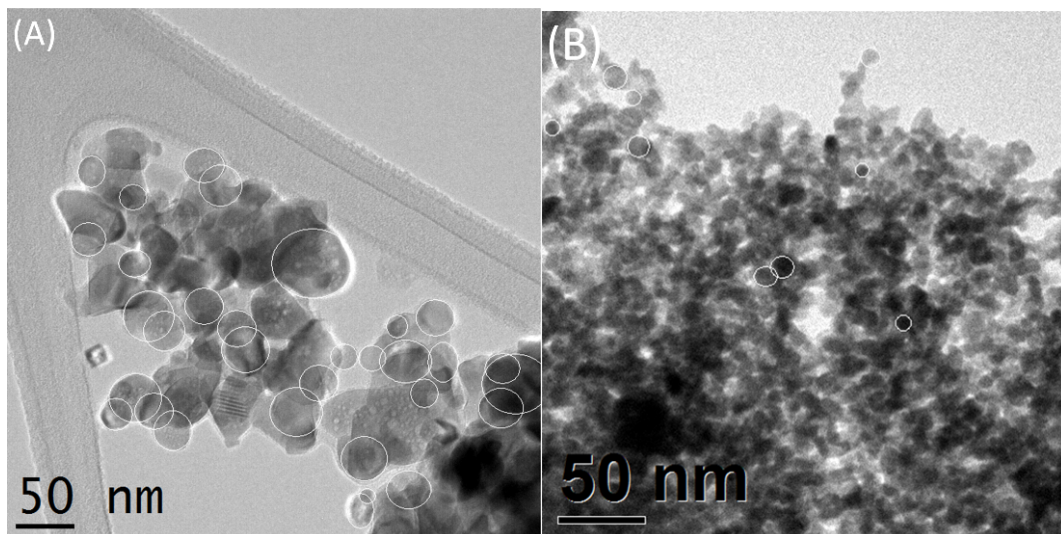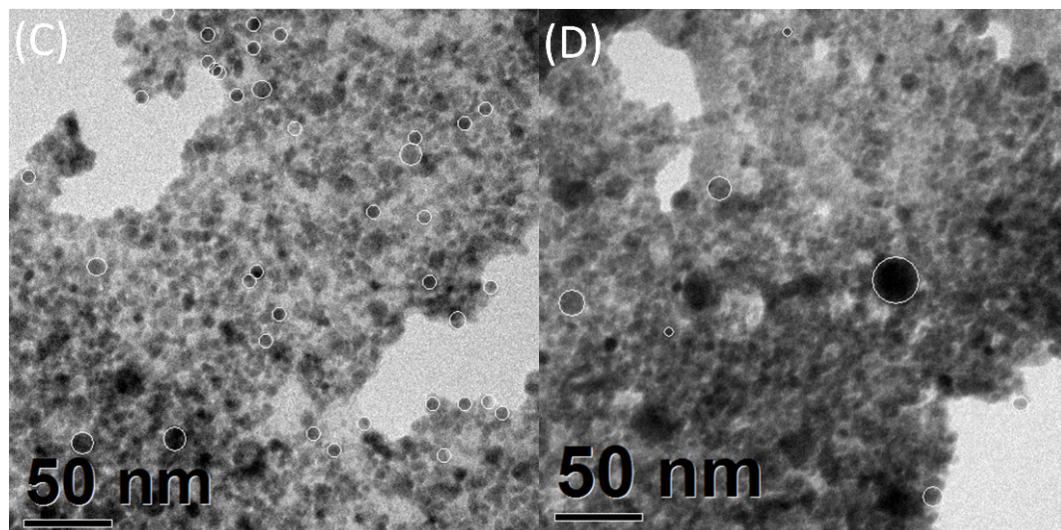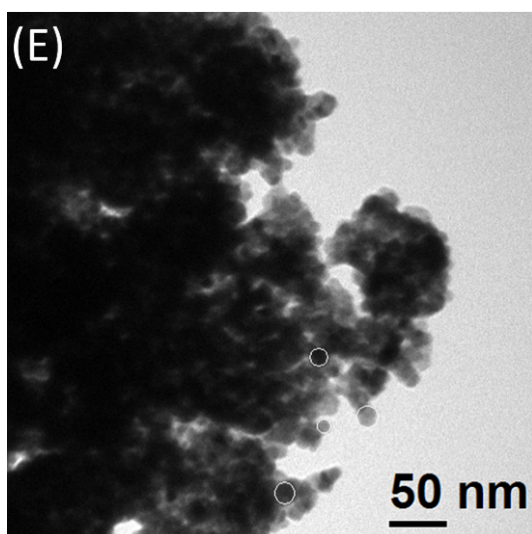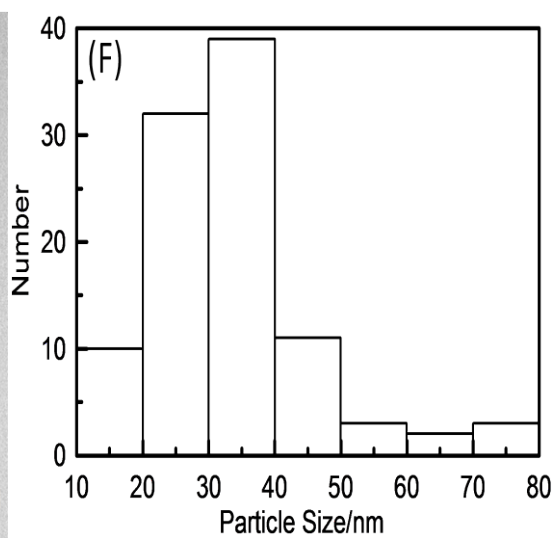



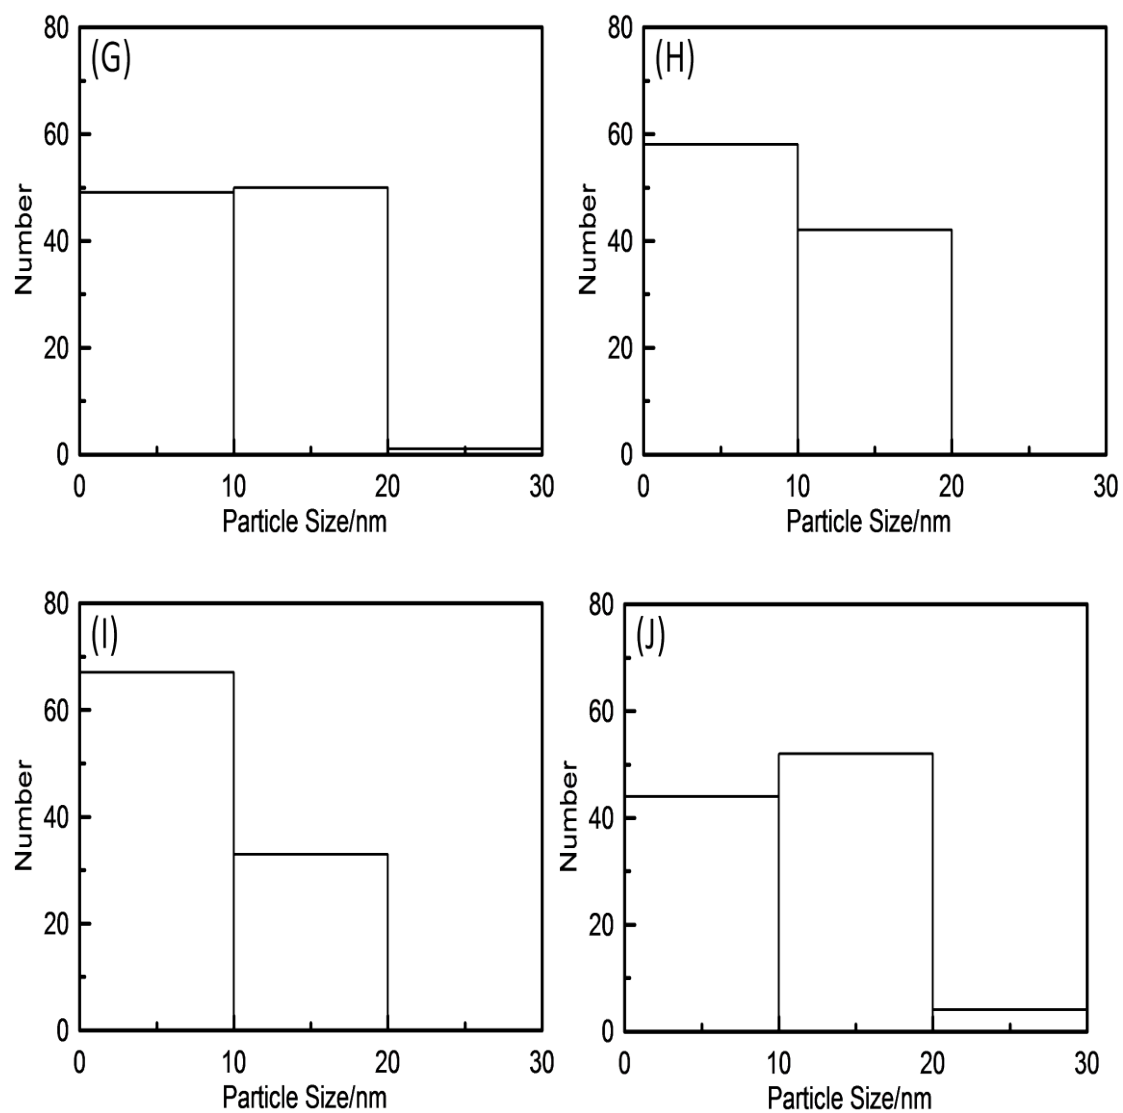

**Figure S3** (A-E) TEM images and (F-J) particle size distributions of (A,F) TiO<sub>2</sub>, (B,G)

Ti<sub>0.75</sub>Sn<sub>0.25</sub>O<sub>2</sub>, (C,H) Ti<sub>0.5</sub>Sn<sub>0.5</sub>O<sub>2</sub>, (D,I) Ti<sub>0.25</sub>Sn<sub>0.75</sub>O<sub>2</sub>, (E,J) SnO<sub>2</sub> with

annealing in air at 800 °C.

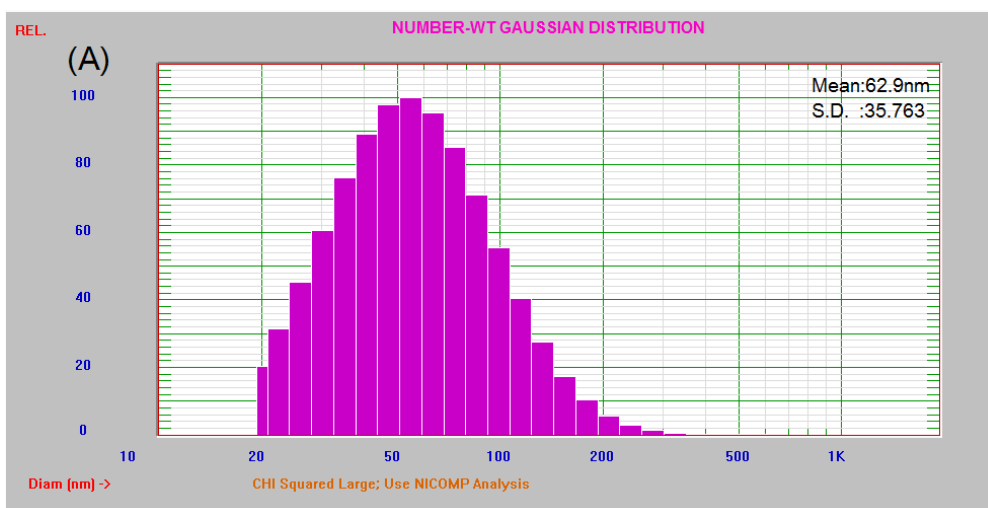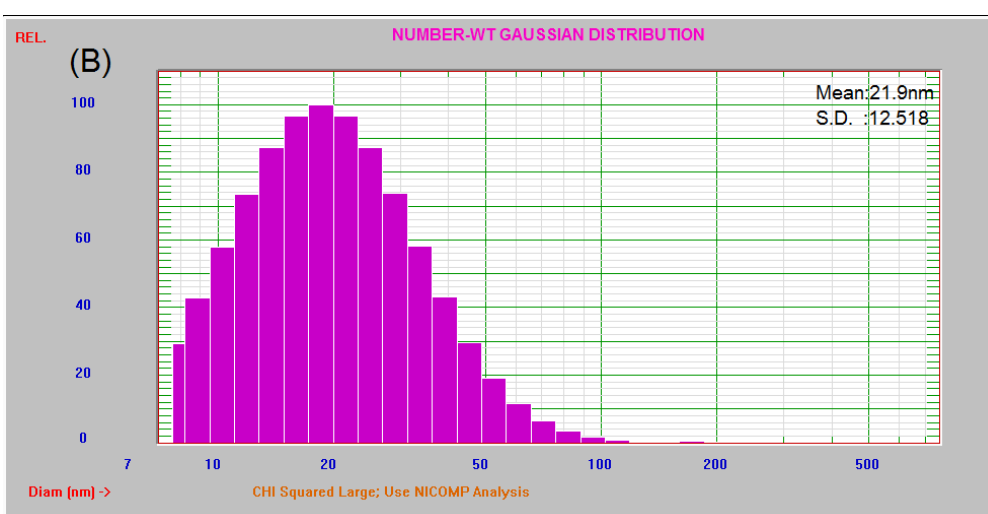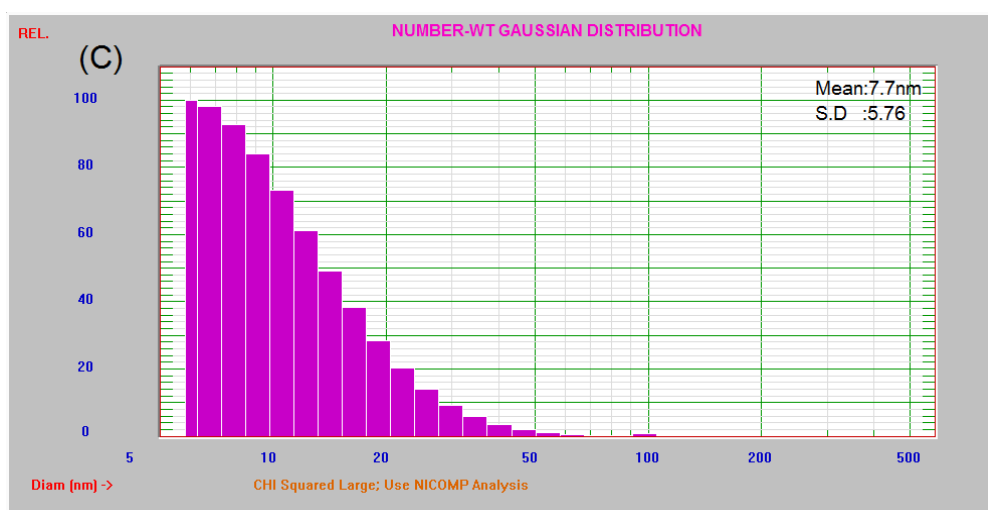

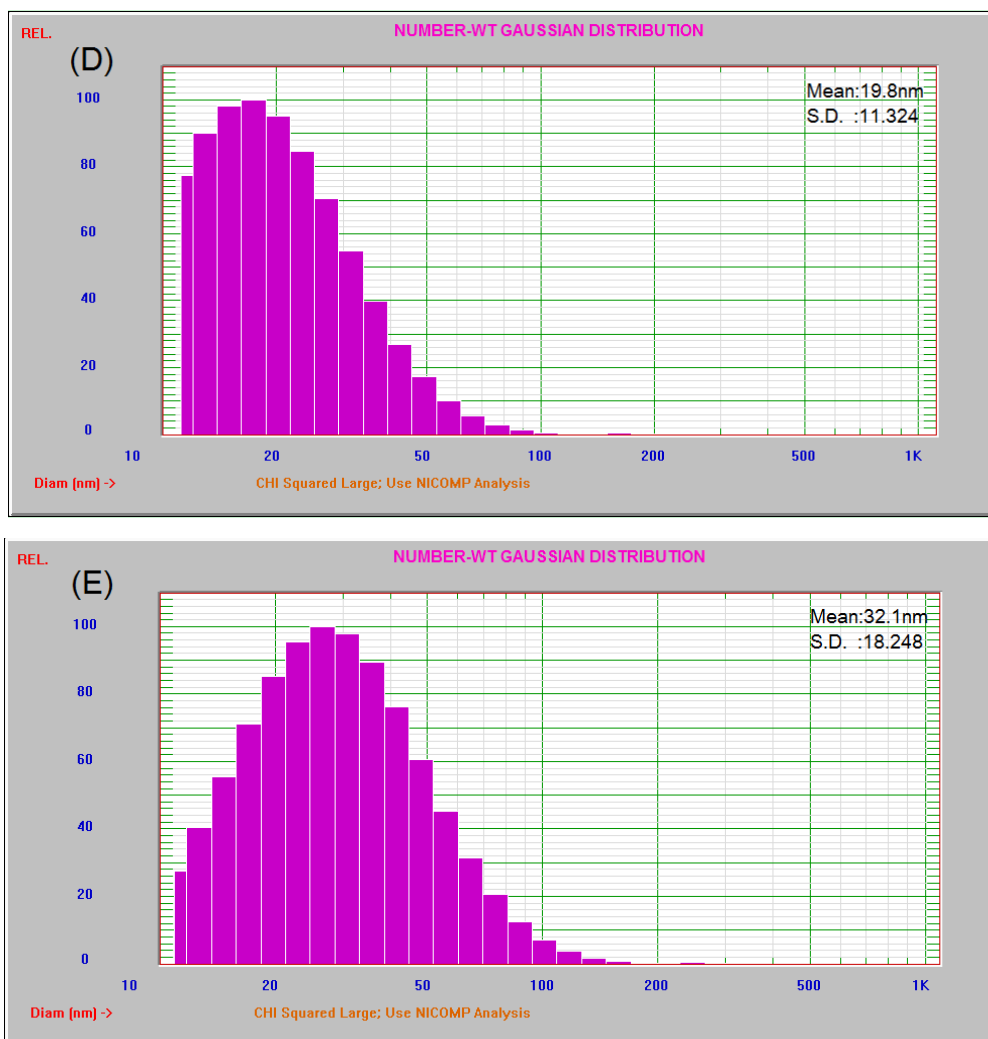

**Figure S4** Particle size distributions of (A)  $\text{TiO}_2$ , (B)  $\text{Ti}_{0.75}\text{Sn}_{0.25}\text{O}_2$ , (C)  $\text{Ti}_{0.5}\text{Sn}_{0.5}\text{O}_2$ ,  
(D)  $\text{Ti}_{0.25}\text{Sn}_{0.75}\text{O}_2$ , (E)  $\text{SnO}_2$  with annealing in air at 800 °C.

The order of oxides with respect to decreasing the average particle size is:  $\text{TiO}_2 >$   
 $\text{SnO}_2 > \text{Ti}_{0.75}\text{Sn}_{0.25}\text{O}_2 > \text{Ti}_{0.25}\text{Sn}_{0.75}\text{O}_2 > \text{Ti}_{0.5}\text{Sn}_{0.5}\text{O}_2$ .

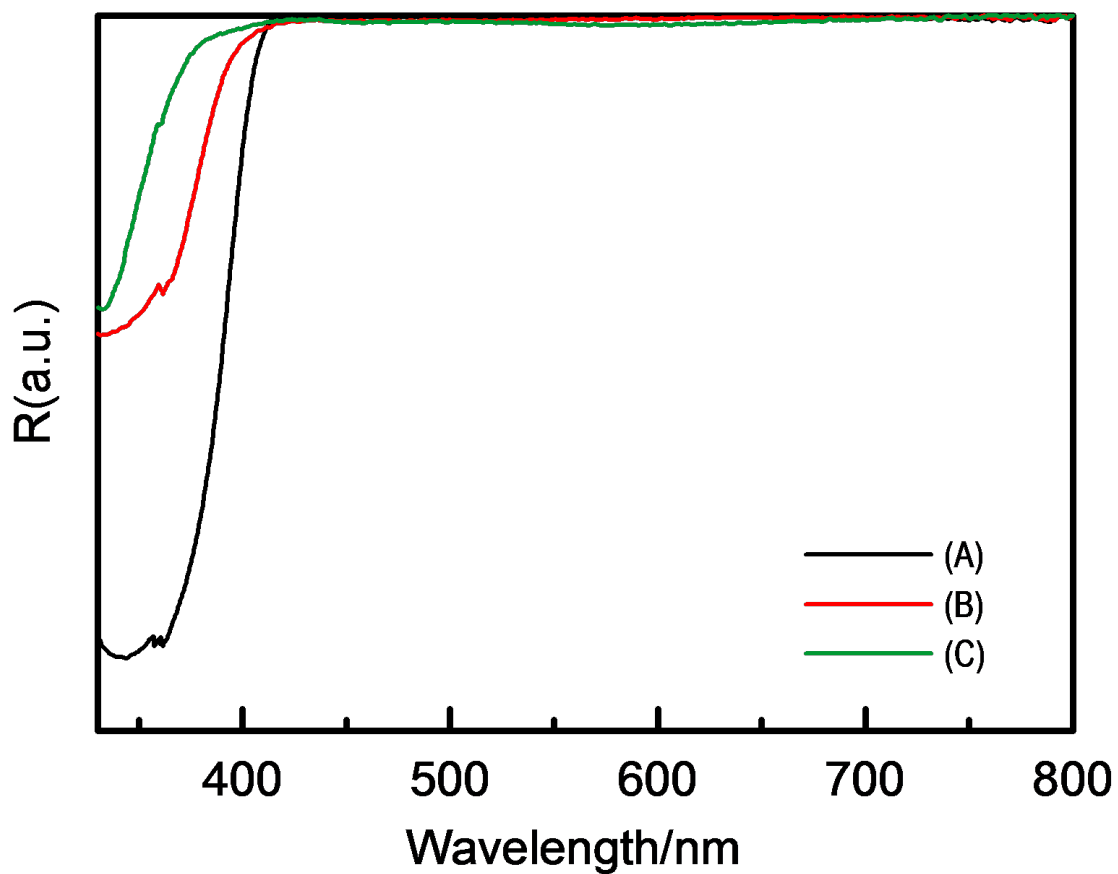

**Figure S5** UV-VIS diffusion reflectance spectra of (A)  $\text{TiO}_2$ , (B)  $\text{Ti}_{0.5}\text{Sn}_{0.5}\text{O}_2$ , and (C)

$\text{SnO}_2$  with annealing in air at 800 °C.

The spectrum of the binary oxide located between the spectra corresponding to

$\text{SnO}_2$  and  $\text{TiO}_2$  supports the successful formation of a  $\text{Ti}_{0.5}\text{Sn}_{0.5}\text{O}_2$  solid solution.
